# Supplementary material for: Two High-Quality Cygnus Genome Assemblies Reveal Genomic Variations Associated with Plumage Color
Source: MDPI journal article supplement (doi:10.3390/ijms242316953), 2023-11-29
Supplement: s1 [file s1]

## Supporting Information for

# Two high-quality *Cygnus* genome assemblies reveal genomic variations associated with plumage color

Yuqing Chong <sup>1,†</sup>, Xiaolong Tu <sup>2,\*†</sup>, Ying Lu <sup>1</sup>, Zhendong Gao <sup>1</sup>, Xiaoming He <sup>1</sup>, Jieyun Hong <sup>1</sup>, Jiao Wu <sup>1</sup>, DongDong Wu <sup>2</sup>, Dongmei Xi <sup>1</sup>, Weidong Deng <sup>1,\*</sup>

### This file includes:

Figures S1 to S5

Tables S1 to S19

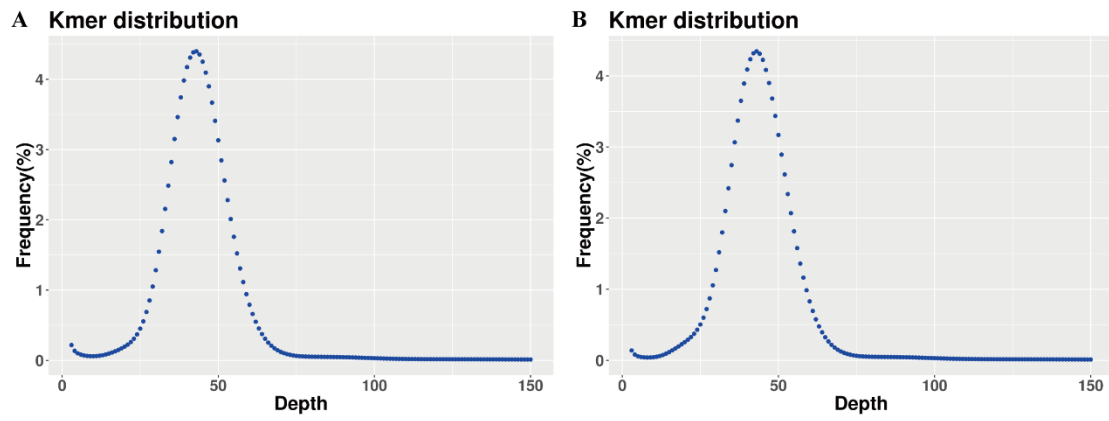

**Figure S1.** The K-mer distribution diagram for the *C. olor* (A), and the *C. atratus* (B).

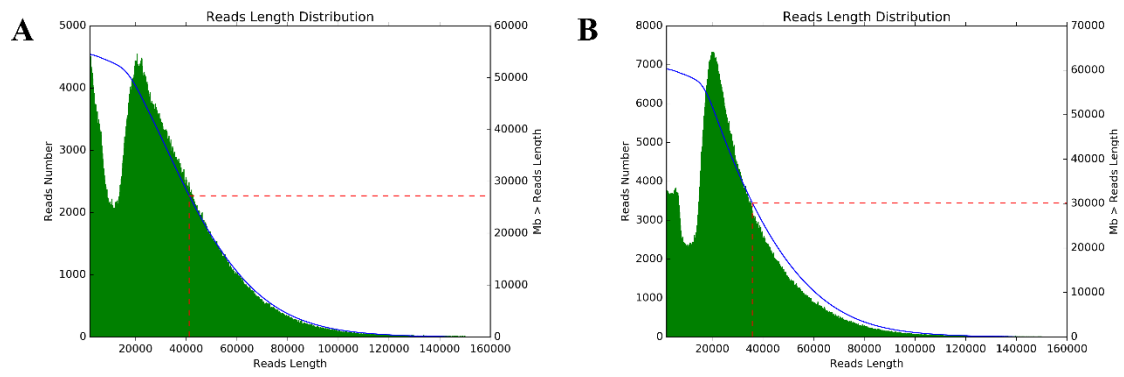

**Figure S2.** The distribution of Nanopore clean reads length. A, The distribution of clean reads length of the *C. olor*; B, The distribution of clean reads length of the *C. atratus*.



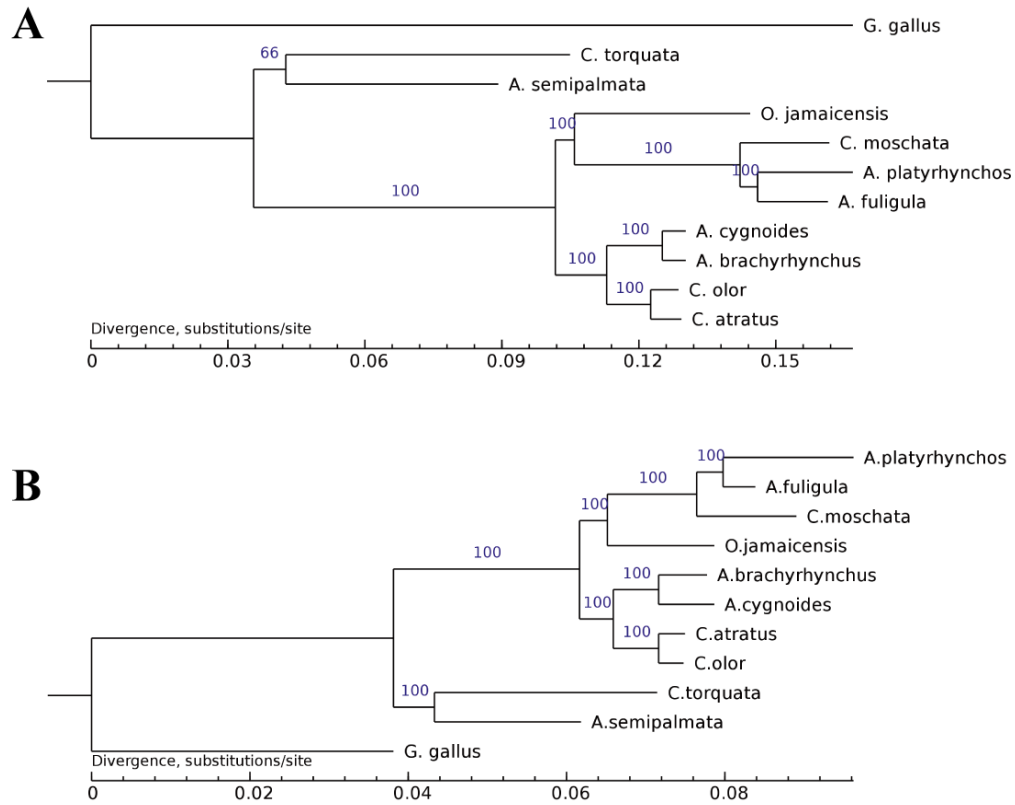

**Figure S4.** Phylogenetic analysis of *C. olor* and *C. atratus* with other species. A, phylogenetic tree constructed based on 4-fold degenerate sites. B, phylogenetic tree constructed based on CDS sequence.

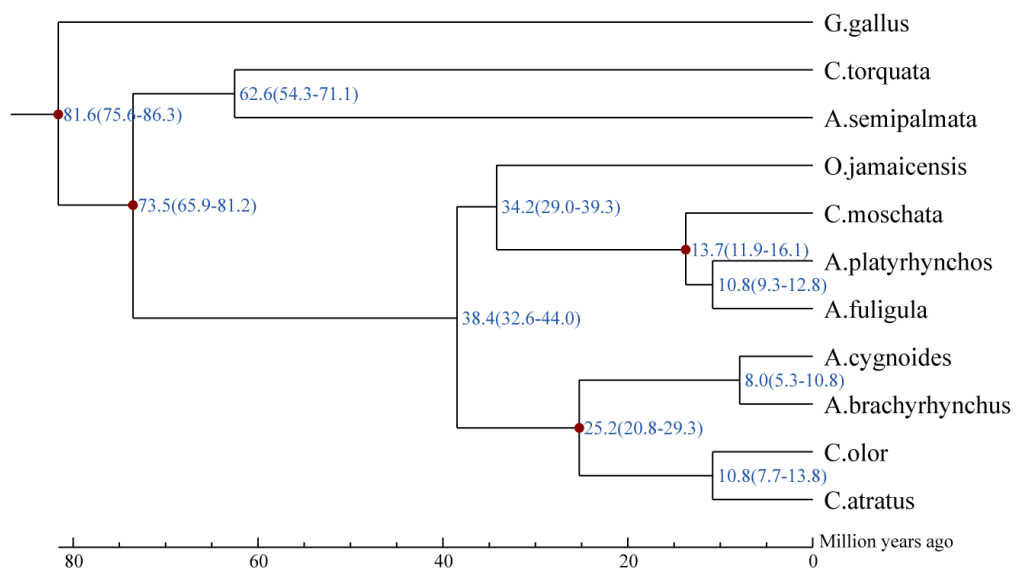

**Figure S5.** Divergence time analysis of *C. olor* and *C. atratus* with other species.

**Table S1.** The result of Illumina Hiseq reads.

| Species           | Library<br>(bp) | Data (Gb) | GC (%) | Q20 (%) | Q30 (%) | Depth (×) |
|-------------------|-----------------|-----------|--------|---------|---------|-----------|
| <i>C. olor</i>    | 350             | 65.56     | 46.15  | 95.61   | 90.7    | 53.38     |
| <i>C. atratus</i> | 350             | 62.75     | 43.18  | 96.68   | 92.21   | 51.5      |

**Table S2.** Statistics of *C. olor* and *C. atratus* genome survey.

| Parameter                    | <i>C. olor</i> | <i>C. atratu</i> |
|------------------------------|----------------|------------------|
| <i>K-mer</i>                 | 21             | 21               |
| <i>K-mer</i> number          | 56,748,688,331 | 54,326,325,329   |
| <i>K-mer</i> depth           | 42.01          | 42.1             |
| Filtered <i>K-mer</i> number | 51,600,734,780 | 51,292,910,399   |
| Genome size                  | 1.23           | 1.22             |
| Heterozygous ratio           | 0.11%          | 0.14%            |
| Repeat                       | 14.76%         | 14.09%           |



**Table S3.** Statistical results of Nanopore sequencing data of *C. olor* and *C. atratus*.

| Species           | Data type  | SeqNum    | SumBase (bp)   | N50Len (bp) | N90Len (bp) | MeanLen (bp) | MaxLen (bp) | MeanQual |
|-------------------|------------|-----------|----------------|-------------|-------------|--------------|-------------|----------|
| <i>C. olor</i>    | Raw data   | 2,777,117 | 63,201,308,418 | 40,606      | 18,397      | 22,757       | 331,957     | 7.56     |
|                   | Clean data | 1,734,438 | 54,688,747,783 | 41,316      | 19,305      | 31,531       | 320,873     | 9        |
| <i>C. atratus</i> | Raw data   | 3,027,341 | 65,583,872,446 | 35,405      | 17,606      | 21,663       | 478,493     | 8.06     |
|                   | Clean data | 2,071,429 | 60,390,205,766 | 35,925      | 18,275      | 29,153       | 355,349     | 9.5      |

SeqNum, the number of sequences; SumBase, the total number of bases; N50Len: the length of data N50; N90Len: the length of data N90; MeanLen: the average reads length; MaxLen: the longest reads length; MeanQual: the average reads quality value.

**Table S4.** The distribution of Nanopore data length of *C. olor* and *C. atratus*.

| Species           | Length        | ReadsNum | TotalLength    | Percent | AveLength |
|-------------------|---------------|----------|----------------|---------|-----------|
| <i>C. olor</i>    | 2,000~5,000   | 119,192  | 408,995,957    | 0.74%   | 3,431     |
|                   | 5,000~10,000  | 136,615  | 990,450,853    | 1.81%   | 7,250     |
|                   | 10,000~20,000 | 294,559  | 4,646,497,038  | 8.49%   | 15,774    |
|                   | 20,000~30,000 | 395,104  | 9,785,237,130  | 17.89%  | 24,766    |
|                   | 30,000~40,000 | 294,467  | 10,225,647,395 | 18.69%  | 34,726    |
|                   | 40,000~50,000 | 200,167  | 8,933,448,596  | 16.33%  | 44,630    |
|                   | 50,000~60,000 | 126,369  | 6,899,679,915  | 12.61%  | 54,599    |
|                   | 60,000~70,000 | 76,442   | 4,933,733,219  | 9.02%   | 64,542    |
|                   | 70,000~80,000 | 43,062   | 3,208,621,186  | 5.86%   | 74,512    |
|                   | >=80,000      | 48,461   | 4,656,436,494  | 8.51%   | 96,086    |
| <i>C. atratus</i> | 2000~5000     | 109,360  | 382,147,045    | 0.63%   | 3,494     |
|                   | 5000~10000    | 148,912  | 1,075,951,322  | 1.78%   | 7,225     |
|                   | 10000~20000   | 425,647  | 6,900,973,403  | 11.42%  | 16,213    |
|                   | 20000~30000   | 591,311  | 14,516,394,951 | 24.03%  | 24,550    |
|                   | 30000~40000   | 339,431  | 11,727,619,211 | 19.41%  | 34,551    |
|                   | 40000~50000   | 199,849  | 8,906,030,654  | 14.74%  | 44,564    |
|                   | 50000~60000   | 117,446  | 6,407,374,286  | 10.60%  | 54,556    |
|                   | 60000~70000   | 66,703   | 4,303,655,168  | 7.12%   | 64,520    |
|                   | 70000~80000   | 36,243   | 2,698,858,366  | 4.46%   | 74,466    |
|                   | >=80000       | 36,527   | 3,471,201,360  | 5.74%   | 95,031    |

**Table S5.** Statistical information of second-generation sequencing data alignment.

| <b>Species</b>    | <b>Total reads</b> | <b>Mapped reads</b> | <b>Mapped (%)</b> | <b>Properly mapped reads</b> | <b>Properly mapped (%)</b> |
|-------------------|--------------------|---------------------|-------------------|------------------------------|----------------------------|
| <i>C. olor</i>    | 437,801,026        | 435,447,876         | 99.46             | 406,886,910                  | 92.94                      |
| <i>C. atratus</i> | 418,912,758        | 416,300,170         | 99.38             | 405,847,144                  | 96.88                      |

Total reads, the number of clean reads; Mapped reads, the number of clean reads located to the reference genome; Mapped (%), the percentage of clean reads mapped to the reference genome in all clean reads; Properly mapped reads, the number of clean reads that both pair reads mapped to the reference genome.

**Table S6.** Evaluation results of the core gene integrity.

| Species           | Number of 458 CEG* present in assembly | % of 458 CEGs present in assemblies | Number of 248 highly conserved CEGs present | % of 248 highly conserved CEGs present |
|-------------------|----------------------------------------|-------------------------------------|---------------------------------------------|----------------------------------------|
| <i>C. olor</i>    | 450                                    | 98.25%                              | 243                                         | 97.98%                                 |
| <i>C. atratus</i> | 447                                    | 97.60%                              | 239                                         | 96.37%                                 |

Number of 458 CEG\* present in assembly, the number of 458 genes found in the assembled genome in the CEGMA v2.5 database; % of 458 CEGs present in assemblies, the proportion of conserved genes contained in the assembled genome in 458 conserved genes; Number of 248 highly conserved CEGs present, the number of 248 highly conserved genes found in the genome; % of 248 highly conserved CEGs present, the highly conserved genes contained in the assembled genome account for the proportion of 248 highly conserved genes

**Table S7.** Evaluation results of BUSCO.

| Species           | Complete BUSCOs  | Complete and single-copy BUSCOs | Complete and duplicated BUSCOs | Fragmented BUSCOs | Missing BUSCOs | Total Lineage BUSCOs |
|-------------------|------------------|---------------------------------|--------------------------------|-------------------|----------------|----------------------|
| <i>C. olor</i>    | 2546<br>(98.45%) | 2534 (97.99%)                   | 12 (0.46%)                     | 20 (0.77%)        | 20<br>(0.77%)  | 2,586                |
| <i>C. atratus</i> | 2542<br>(98.30%) | 2530 (97.83%)                   | 12 (0.46%)                     | 22 (0.85%)        | 22<br>(0.85%)  | 2,586                |

Complete BUSCOs, the number of complete genes found; Complete and single copy BUSCOs, the number of single copy genes; Complete and duplicated BUSCOs, the number of multi copy genes; Fragmented BUSCOs, the number of incomplete prediction genes; Missing BUSCOs, the number of unpredicted genes.

**Table S8.** Repeat sequence prediction for *C. olor* and *C. atratus*.

| Species           | Type               | Number  | Length     | Rate (%) |
|-------------------|--------------------|---------|------------|----------|
| <i>C. olor</i>    | ClassI             | 279,541 | 81,820,333 | 7.28     |
|                   | ClassI/DIRS        | 905     | 60,863     | 0.01     |
|                   | ClassI/LARD        | 33,988  | 9,051,253  | 0.81     |
|                   | ClassI/LINE        | 190,987 | 58,339,998 | 5.19     |
|                   | ClassI/LTR/Copia   | 438     | 70,803     | 0.01     |
|                   | ClassI/LTR/Gypsy   | 6,398   | 553,594    | 0.05     |
|                   | ClassI/LTR/Unknown | 41,246  | 18,247,630 | 1.62     |
|                   | ClassI/PLE         | 3,377   | 1,345,259  | 0.12     |
|                   | ClassI/SINE        | 1,574   | 215,330    | 0.02     |
|                   | ClassI/TRIM        | 152     | 87,732     | 0.01     |
|                   | ClassI/Unknown     | 476     | 73,870     | 0.01     |
|                   | ClassII            | 41,729  | 3,268,808  | 0.29     |
|                   | ClassII/Crypton    | 688     | 40,913     | 0        |
|                   | ClassII/Helitron   | 2,263   | 199,931    | 0.02     |
|                   | ClassII/MITE       | 10      | 1,667      | 0        |
|                   | ClassII/Maverick   | 2,408   | 355,119    | 0.03     |
|                   | ClassII/TIR        | 22,899  | 2,030,997  | 0.18     |
|                   | ClassII/Unknown    | 13,461  | 954,340    | 0.08     |
|                   | PotentialHostGene  | 485     | 144,549    | 0.01     |
|                   | SSR                | 2,375   | 1,439,824  | 0.13     |
|                   | Unknown            | 5,686   | 1,243,017  | 0.11     |
|                   | Total              | 329,816 | 86,692,218 | 7.71     |
| <i>C. atratus</i> | ClassI             | 290,732 | 88,567,402 | 7.84     |
|                   | ClassI/DIRS        | 900     | 59,454     | 0.01     |
|                   | ClassI/LARD        | 37,500  | 10,744,331 | 0.95     |
|                   | ClassI/LINE        | 198,103 | 62,215,959 | 5.51     |
|                   | ClassI/LTR/Copia   | 425     | 341,007    | 0.03     |
|                   | ClassI/LTR/Gypsy   | 5,781   | 494,569    | 0.04     |
|                   | ClassI/LTR/Unknown | 40,025  | 17,693,529 | 1.57     |
|                   | ClassI/PLE         | 5,619   | 3,729,504  | 0.33     |
|                   | ClassI/SINE        | 1,536   | 215,284    | 0.02     |
|                   | ClassI/TRIM        | 176     | 145,812    | 0.01     |
|                   | ClassI/Unknown     | 667     | 372,285    | 0.03     |
|                   | ClassII            | 37,383  | 2,451,902  | 0.22     |
|                   | ClassII/Crypton    | 599     | 36,739     | 0        |
|                   | ClassII/Helitron   | 2,116   | 149,572    | 0.01     |
|                   | ClassII/MITE       | 19      | 12,097     | 0        |
|                   | ClassII/Maverick   | 1,278   | 127,223    | 0.01     |
|                   | ClassII/TIR        | 20,776  | 1,513,866  | 0.13     |
|                   | ClassII/Unknown    | 12,595  | 897,072    | 0.08     |
|                   | PotentialHostGene  | 296     | 152,756    | 0.01     |

|         |         |            |      |
|---------|---------|------------|------|
| SSR     | 3,051   | 1,648,239  | 0.15 |
| Unknown | 4,503   | 1,788,457  | 0.16 |
| Total   | 335,965 | 93,487,128 | 8.28 |

---

**Table S9.** Prediction of protein-coding genes.

| Species           | Method             | Software   | Homologous species         | Gene number   |
|-------------------|--------------------|------------|----------------------------|---------------|
| <i>C. olor</i>    | Ab initio          | Genscan    | -                          | 39,788        |
|                   |                    | Augustus   | -                          | 20,063        |
|                   |                    | GlimmerHMM | -                          | 106,607       |
|                   |                    | GeneID     | -                          | 25,868        |
|                   |                    | SNAP       | -                          | 57,634        |
|                   | Homology-based     | GeMoMa     | <i>Anas platyrhynchos</i>  | 15,652        |
|                   |                    |            | <i>Meleagris gallopavo</i> | 18,204        |
|                   |                    |            | <i>Gallus gallus</i>       | 16,103        |
|                   |                    |            | <i>Anser cygnoides</i>     | 15,077        |
|                   |                    |            | -                          | 17,759        |
|                   | <b>Integration</b> | <b>EVM</b> | -                          | <b>17,759</b> |
| <i>C. atratus</i> | Ab initio          | Genscan    | -                          | 37,478        |
|                   |                    | Augustus   | -                          | 20,220        |
|                   |                    | GlimmerHMM | -                          | 120,741       |
|                   |                    | GeneID     | -                          | 25,744        |
|                   |                    | SNAP       | -                          | 60,844        |
|                   | Homology-based     | GeMoMa     | <i>Anas platyrhynchos</i>  | 15,689        |
|                   |                    |            | <i>Meleagris gallopavo</i> | 18,208        |
|                   |                    |            | <i>Gallus gallus</i>       | 16,156        |
|                   |                    |            | <i>Anser cygnoides</i>     | 15,097        |
|                   |                    |            | -                          | 17,835        |
|                   | <b>Integration</b> | <b>EVM</b> | -                          | <b>17,835</b> |



**Table S10.** Information of protein coding prediction genes.

|              | <b>Cygnus olor</b> | <b>Cygnus atratus</b> |
|--------------|--------------------|-----------------------|
| GeneNum      | 17,759             | 17,835                |
| Genelen      | 339,431,319        | 338,737,679           |
| AveGenlen    | 19,113.20          | 18,992.86             |
| ExonLen      | 29,120,988         | 29,120,034            |
| AveExonLen   | 1,639.79           | 1,632.75              |
| ExonNum      | 175,576            | 175,327               |
| AveExonNum   | 9.89               | 9.83                  |
| CDSLen       | 29,120,988         | 29,120,034            |
| AveCDSlen    | 1,639.79           | 1,632.75              |
| CDSNum       | 175,576            | 175,327               |
| AveCDSNum    | 9.89               | 9.83                  |
| IntronLen    | 310,310,331        | 309,617,645           |
| AveIntronLen | 17,473.41          | 17,360.11             |
| IntronNum    | 157,817            | 157,492               |
| AveIntronnum | 8.89               | 8.83                  |

**Table S11.** Prediction results of noncoding RNA.

| Species           | RNA<br>classification | Number | Family |
|-------------------|-----------------------|--------|--------|
| <i>C. olor</i>    | miRNA                 | 207    | 97     |
|                   | rRNA                  | 128    | 4      |
|                   | tRNA                  | 376    | 23     |
| <i>C. atratus</i> | miRNA                 | 215    | 101    |
|                   | rRNA                  | 130    | 4      |
|                   | tRNA                  | 369    | 23     |

**Table S12.** Functional annotation of protein-coding genes.

| Species           | Database      | Annotated number | Percentage (%) |
|-------------------|---------------|------------------|----------------|
| <i>C. olor</i>    | GO            | 7431             | 41.84          |
|                   | KEGG          | 11116            | 62.59          |
|                   | KOG           | 11916            | 67.1           |
|                   | TrEMBL        | 16900            | 95.16          |
|                   | NR            | 16975            | 95.59          |
|                   | All annotated | 16988            | 95.66          |
| <i>C. atratus</i> | GO            | 7409             | 41.54          |
|                   | KEGG          | 11143            | 62.48          |
|                   | KOG           | 11939            | 66.94          |
|                   | TrEMBL        | 16963            | 95.11          |
|                   | NR            | 17027            | 95.47          |
|                   | All annotated | 17048            | 95.59          |

**Table S13.** Summary of the gene family analysis results for 11 species.

| Species           | Genes<br>number | Genes in<br>families | Unclustered<br>genes | Family<br>number | Unique<br>families | Unique<br>genes | Average genes<br>per family |
|-------------------|-----------------|----------------------|----------------------|------------------|--------------------|-----------------|-----------------------------|
| A.platyrrhynchus  | 16,765          | 16,028               | 737                  | 12,572           | 62                 | 190             | 1.27                        |
| C.moschata        | 15,898          | 15,253               | 645                  | 12,897           | 4                  | 9               | 1.18                        |
| O.jamaicensis     | 16,417          | 15,786               | 631                  | 13,025           | 40                 | 83              | 1.21                        |
| A.fuligula        | 15,565          | 15,403               | 162                  | 12,679           | 16                 | 51              | 1.21                        |
| A.cygnoides       | 15,439          | 14,956               | 483                  | 12,662           | 3                  | 6               | 1.18                        |
| A.brachyrrhynchus | 15,544          | 15,044               | 500                  | 12,748           | 1                  | 2               | 1.18                        |
| A.semipalmata     | 15,749          | 15,260               | 489                  | 13,063           | 11                 | 22              | 1.17                        |
| C.torquata        | 15,083          | 14,459               | 624                  | 12,557           | 7                  | 14              | 1.15                        |
| G.gallus          | 16,779          | 16,003               | 776                  | 12,602           | 70                 | 302             | 1.27                        |
| C.olor            | 17,759          | 16,649               | 1,110                | 14,052           | 3                  | 7               | 1.18                        |
| C.atratus         | 17,835          | 16,694               | 1,141                | 14,037           | 22                 | 51              | 1.19                        |

**Table S14.** The statistics information of SVs in *C.olor* and *C.atratus*.

| Type of SVS        | Size range    | Count | Total bp |
|--------------------|---------------|-------|----------|
| Insertion          | 50-500 bp     | 4873  | 752195   |
|                    | 500-10,000 bp | 3444  | 5172785  |
|                    | Total         | 8317  | 5924980  |
| Deletion           | 50-500 bp     | 5232  | 784994   |
|                    | 500-10,000 bp | 2963  | 5054219  |
|                    | Total         | 8195  | 5839213  |
| Tandem expansion   | 50-500 bp     | 372   | 89800    |
|                    | 500-10,000 bp | 323   | 857255   |
|                    | Total         | 695   | 947055   |
| Tandem contraction | 50-500 bp     | 506   | 116648   |
|                    | 500-10,000 bp | 329   | 762915   |
|                    | Total         | 835   | 879563   |
| Repeat expansion   | 50-500        | 796   | 173850   |
|                    | 500-10,000    | 913   | 2232519  |
|                    | Total         | 1709  | 2406369  |
| Repeat contraction | 50-500        | 876   | 174317   |
|                    | 500-10,000    | 757   | 1809839  |
|                    | Total         | 1633  | 1984156  |
| Total              |               | 21384 |          |

**Table S15.** The information of positive selected genes.

| GeneID         | 2ΔlnL     | P value  | Gene name  |
|----------------|-----------|----------|------------|
| Cygnus olor    |           |          |            |
| EVM0000599.1   | 8.069412  | 4.50E-03 | ATAD5      |
| EVM0001180.1   | 9.492328  | 2.06E-03 | HEATR6     |
| EVM0001472.1   | 7.640908  | 5.71E-03 | ZNF804A    |
| EVM0003170.1   | 7.58529   | 5.88E-03 | GALNS      |
| EVM0003193.1   | 6.749794  | 9.38E-03 | BRCA1      |
| EVM0003231.1   | 11.27513  | 7.86E-04 | B4GALNT3   |
| EVM0003756.1   | 8.10541   | 4.41E-03 | HPDL       |
| EVM0003861.1   | 6.28702   | 1.22E-02 | FAHD2A     |
| EVM0005510.1   | 7.2756    | 6.99E-03 | NA         |
| EVM0006686.1   | 18.457366 | 1.74E-05 | SNAPC3     |
| EVM0007654.1   | 14.914106 | 1.13E-04 | FNDC1      |
| EVM0008183.1   | 7.452896  | 6.33E-03 | FAM172A    |
| EVM0008228.1   | 6.580366  | 1.03E-02 | LEO1       |
| EVM0009007.1   | 8.894462  | 2.86E-03 | RASD1      |
| EVM0011232.1   | 6.766208  | 9.29E-03 | NA         |
| EVM0011487.1   | 9.431608  | 2.13E-03 | IQCA1      |
| EVM0013181.1   | 6.685916  | 9.72E-03 | DCDC2      |
| EVM0013323.1   | 7.401326  | 6.52E-03 | LDAH       |
| EVM0013568.1   | 7.351338  | 6.70E-03 | SH3KBP1    |
| EVM0014344.1   | 9.863006  | 1.69E-03 | NAXE       |
| EVM0014912.1   | 8.50467   | 3.54E-03 | CEP164     |
| EVM0015163.1   | 7.233686  | 7.15E-03 | DYX1C1     |
| EVM0015735.1   | 14.769438 | 1.21E-04 | PDLIM7     |
| EVM0015737.1   | 8.859608  | 2.92E-03 | TDO2       |
| EVM0016544.1   | 5.874436  | 1.54E-02 | GRAMD2B    |
| EVM0017354.1   | 5.80324   | 1.60E-02 | ZNF516     |
| Cygnus atratus |           |          |            |
| EVM0000527.1   | 7.856818  | 5.06E-03 | PNPT1      |
| EVM0001431.1   | 5.098776  | 2.39E-02 | GALNT15    |
| EVM0001536.1   | 7.692264  | 5.55E-03 | TTC19      |
| EVM0001881.1   | 6.557388  | 1.04E-02 | STK31      |
| EVM0001970.1   | 6.763134  | 9.31E-03 | NA         |
| EVM0002810.1   | 4.719872  | 2.98E-02 | ZNF516     |
| EVM0002978.1   | 8.939984  | 2.79E-03 | ZNF335     |
| EVM0003067.1   | 4.438716  | 3.51E-02 | IQCH       |
| EVM0003488.1   | 7.087948  | 7.76E-03 | CENPC      |
| EVM0003604.1   | 5.368108  | 2.05E-02 | DCBLD1     |
| EVM0004383.1   | 7.63194   | 5.73E-03 | SERINC2    |
| EVM0006379.1   | 5.660372  | 1.74E-02 | NOL8       |
| EVM0008448.1   | 8.931096  | 2.80E-03 | C26H6orf89 |
| EVM0009914.1   | 5.74314   | 1.66E-02 | ISG20      |

|                              |           |          |          |
|------------------------------|-----------|----------|----------|
| EVM0010230.1                 | 5.66613   | 1.73E-02 | GPRIN2   |
| EVM0011043.1                 | 3.880702  | 4.88E-02 | OLAH     |
| EVM0011989.1                 | 6.390094  | 1.15E-02 | CSTF3    |
| EVM0012156.1                 | 4.217618  | 4.00E-02 | GTF2IRD1 |
| EVM0012722.1                 | 10.021572 | 1.55E-03 | VWA9     |
| EVM0013170.1                 | 6.944142  | 8.41E-03 | PLEKHG7  |
| EVM0015731.1                 | 12.795864 | 3.47E-04 | ELP1     |
| EVM0016054.1                 | 9.306762  | 2.28E-03 | BFSP2    |
| EVM0017167.1                 | 7.63352   | 5.73E-03 | FOS      |
| EVM0017335.1                 | 9.329928  | 2.25E-03 | TTLL9    |
| EVM0017511.1                 | 3.913726  | 4.79E-02 | REXO5    |
| EVM0017814.1                 | 5.703248  | 1.69E-02 | ZNF469   |
| <hr/>                        |           |          |          |
| Cygnus olor + Cygnus atratus |           |          |          |
| <hr/>                        |           |          |          |
| EVM0000333.1                 | 5.085622  | 2.41E-02 | CCDC170  |
| EVM0000469.1                 | 8.631904  | 3.30E-03 | Sla2     |
| EVM0000793.1                 | 8.017968  | 4.63E-03 | NBR1     |
| EVM0000976.1                 | 10.590808 | 1.14E-03 | AGA      |
| EVM0001137.1                 | 6.803354  | 9.10E-03 | BLOC1S2  |
| EVM0002221.1                 | 4.314614  | 3.78E-02 | CAV2     |
| EVM0002636.1                 | 6.83858   | 8.92E-03 | POLH     |
| EVM0003015.1                 | 6.104464  | 1.35E-02 | KAZN     |
| EVM0003909.1                 | 6.217668  | 1.26E-02 | MKRN2    |
| EVM0004076.1                 | 4.951694  | 2.61E-02 | KIAA1524 |
| EVM0004316.1                 | 7.900574  | 4.94E-03 | FANCC    |
| EVM0004329.1                 | 7.633502  | 5.73E-03 | EXOC8    |
| EVM0004437.1                 | 10.733814 | 1.05E-03 | PPID     |
| EVM0005461.1                 | 7.88307   | 4.99E-03 | TMEM200B |
| EVM0006221.1                 | 8.974244  | 2.74E-03 | SYNDIG1  |
| EVM0006411.1                 | 6.603334  | 1.02E-02 | TASOR    |
| EVM0006909.1                 | 5.31025   | 2.12E-02 | PSPC1    |
| EVM0007014.1                 | 5.703776  | 1.69E-02 | LRRC6    |
| EVM0007571.1                 | 3.933588  | 4.73E-02 | PTHLH    |
| EVM0008551.1                 | 5.27517   | 2.16E-02 | GPC3     |
| EVM0008737.1                 | 5.568092  | 1.83E-02 | IQCG     |
| EVM0009121.1                 | 9.487864  | 2.07E-03 | CD36     |
| EVM0010775.1                 | 4.249474  | 3.93E-02 | ASPM     |
| EVM0011058.1                 | 8.181358  | 4.23E-03 | ATXN10   |
| EVM0011748.1                 | 3.842534  | 5.00E-02 | MELTF    |
| EVM0011940.1                 | 5.8682    | 1.54E-02 | OLFM4    |
| EVM0011983.1                 | 6.176676  | 1.29E-02 | PQLC2    |
| EVM0012310.1                 | 7.173148  | 7.40E-03 | FBXL5    |
| EVM0012655.1                 | 9.180586  | 2.45E-03 | PLEKHG7  |
| EVM0012977.1                 | 7.651182  | 5.67E-03 | FAS      |
| EVM0013075.1                 | 8.359562  | 3.84E-03 | NA       |
| EVM0013127.1                 | 3.891078  | 4.85E-02 | SCNN1B   |
| EVM0013370.1                 | 10.204356 | 1.40E-03 | EVX1     |

|              |           |          |         |
|--------------|-----------|----------|---------|
| EVM0013884.1 | 9.31654   | 2.27E-03 | RASL10B |
| EVM0014068.1 | 5.662906  | 1.73E-02 | COG8    |
| EVM0014738.1 | 6.813498  | 9.05E-03 | CCDC18  |
| EVM0014952.1 | 7.16969   | 7.41E-03 | PTER    |
| EVM0016309.1 | 4.89757   | 2.69E-02 | AATF    |
| EVM0016634.1 | 5.376568  | 2.04E-02 | PBRM1   |
| EVM0017347.1 | 18.469044 | 1.73E-05 | MCM2    |

---



**Table S16.** The results of GO enrichment analyses (g:Profiler) for the positive selected genes of *C.olor* and *C.atratus*.

| Groups                | Functional category | Term description                                                                                                              | Term Type          | FDR      | No.of genes involved |
|-----------------------|---------------------|-------------------------------------------------------------------------------------------------------------------------------|--------------------|----------|----------------------|
| <b>Cygnus olor</b>    | GO:0016701          | oxidoreductase activity, acting on single donors with incorporation of molecular oxygen                                       | molecular_function | 3.70E-03 | 2                    |
|                       | GO:0016702          | oxidoreductase activity, acting on single donors with incorporation of molecular oxygen, incorporation of two atoms of oxygen | molecular_function | 3.70E-03 | 2                    |
|                       | GO:0003674          | molecular_function                                                                                                            | molecular_function | 2.17E-02 | 20                   |
|                       | GO:0051213          | dioxygenase activity                                                                                                          | molecular_function | 2.17E-02 | 2                    |
| <b>Cygnus atratus</b> | GO:0000175          | 3'-5'-exoribonuclease activity                                                                                                | molecular_function | 7.92E-03 | 2                    |
|                       | GO:0016796          | exonuclease activity, active with either ribo- or deoxyribonucleic acids and producing 5'-phosphomonoesters                   | molecular_function | 7.92E-03 | 2                    |
|                       | GO:0004532          | exoribonuclease activity                                                                                                      | molecular_function | 7.92E-03 | 2                    |
|                       | GO:0016896          | exoribonuclease activity, producing 5'-phosphomonoesters                                                                      | molecular_function | 7.92E-03 | 2                    |
|                       | GO:0008408          | 3'-5' exonuclease activity                                                                                                    | molecular_function | 7.92E-03 | 2                    |
|                       | GO:1990837          | sequence-specific double-stranded DNA binding                                                                                 | molecular_function | 7.92E-03 | 5                    |
|                       | GO:0003676          | nucleic acid binding                                                                                                          | molecular_function | 7.92E-03 | 9                    |
|                       | GO:0097159          | organic cyclic compound binding                                                                                               | molecular_function | 7.92E-03 | 11                   |
|                       | GO:1901363          | heterocyclic compound binding                                                                                                 | molecular_function | 7.92E-03 | 11                   |
|                       | GO:0003690          | double-stranded DNA binding                                                                                                   | molecular_function | 7.99E-03 | 5                    |
|                       | GO:0004527          | exonuclease activity                                                                                                          | molecular_function | 8.64E-03 | 2                    |
|                       | GO:0043565          | sequence-specific DNA binding                                                                                                 | molecular_function | 8.64E-03 | 5                    |
|                       | GO:0000987          | cis-regulatory region sequence-specific DNA binding                                                                           | molecular_function | 9.11E-03 | 4                    |
|                       | GO:0000976          | transcription cis-regulatory region binding                                                                                   | molecular_function | 1.79E-02 | 4                    |
|                       | GO:0001067          | transcription regulatory region nucleic acid binding                                                                          | molecular_function | 1.79E-02 | 4                    |
|                       | GO:0003677          | DNA binding                                                                                                                   | molecular_function | 3.53E-02 | 5                    |
|                       | GO:0000978          | RNA polymerase II cis-regulatory region sequence-specific DNA binding                                                         | molecular_function | 3.98E-02 | 3                    |
|                       | GO:0004540          | ribonuclease activity                                                                                                         | molecular_function | 4.01E-02 | 2                    |

|                                                 |            |                                                                                 |                    |          |    |
|-------------------------------------------------|------------|---------------------------------------------------------------------------------|--------------------|----------|----|
|                                                 | GO:0000977 | RNA polymerase II transcription regulatory region sequence-specific DNA binding | molecular_function | 4.93E-02 | 3  |
| <b>Cygnus<br/>olor +<br/>Cygnus<br/>atratus</b> | GO:0048856 | anatomical structure development                                                | biological_process | 1.38E-04 | 18 |
|                                                 | GO:0032502 | developmental process                                                           | biological_process | 1.38E-04 | 19 |
|                                                 | GO:0009987 | cellular process                                                                | biological_process | 1.38E-04 | 34 |
|                                                 | GO:0071840 | cellular component organization or biogenesis                                   | biological_process | 7.00E-04 | 19 |
|                                                 | GO:0048869 | cellular developmental process                                                  | biological_process | 7.31E-04 | 14 |
|                                                 | GO:0030154 | cell differentiation                                                            | biological_process | 7.31E-04 | 14 |
|                                                 | GO:0008150 | biological_process                                                              | biological_process | 7.31E-04 | 34 |
|                                                 | GO:0016043 | cellular component organization                                                 | biological_process | 1.02E-03 | 18 |
|                                                 | GO:0065007 | biological regulation                                                           | biological_process | 1.02E-03 | 26 |
|                                                 | GO:0005515 | protein binding                                                                 | molecular_function | 3.44E-03 | 22 |
|                                                 | GO:0005488 | binding                                                                         | molecular_function | 3.44E-03 | 28 |
|                                                 | GO:0006801 | superoxide metabolic process                                                    | biological_process | 3.62E-03 | 3  |
|                                                 | GO:0003674 | molecular_function                                                              | molecular_function | 5.61E-03 | 32 |
|                                                 | GO:0005516 | calmodulin binding                                                              | molecular_function | 7.16E-03 | 3  |
|                                                 | GO:0048468 | cell development                                                                | biological_process | 9.23E-03 | 9  |
|                                                 | GO:0019430 | removal of superoxide radicals                                                  | biological_process | 1.10E-02 | 2  |
|                                                 | GO:0090322 | regulation of superoxide metabolic process                                      | biological_process | 1.10E-02 | 2  |
|                                                 | GO:0050896 | response to stimulus                                                            | biological_process | 1.10E-02 | 19 |
|                                                 | GO:0071450 | cellular response to oxygen radical                                             | biological_process | 1.11E-02 | 2  |
|                                                 | GO:0071451 | cellular response to superoxide                                                 | biological_process | 1.11E-02 | 2  |
|                                                 | GO:0044085 | cellular component biogenesis                                                   | biological_process | 1.11E-02 | 11 |
|                                                 | GO:0050794 | regulation of cellular process                                                  | biological_process | 1.16E-02 | 22 |
|                                                 | GO:0000305 | response to oxygen radical                                                      | biological_process | 1.22E-02 | 2  |
|                                                 | GO:0000303 | response to superoxide                                                          | biological_process | 1.22E-02 | 2  |
|                                                 | GO:0071214 | cellular response to abiotic stimulus                                           | biological_process | 1.22E-02 | 4  |
|                                                 | GO:0104004 | cellular response to environmental stimulus                                     | biological_process | 1.22E-02 | 4  |

|            |                                           |                    |          |    |
|------------|-------------------------------------------|--------------------|----------|----|
| GO:0006996 | organelle organization                    | biological_process | 1.22E-02 | 12 |
| GO:0051716 | cellular response to stimulus             | biological_process | 1.22E-02 | 17 |
| GO:0048523 | negative regulation of cellular process   | biological_process | 1.30E-02 | 13 |
| GO:0022617 | extracellular matrix disassembly          | biological_process | 1.38E-02 | 2  |
| GO:0030282 | bone mineralization                       | biological_process | 1.41E-02 | 3  |
| GO:0048518 | positive regulation of biological process | biological_process | 1.47E-02 | 15 |
| GO:0097150 | neuronal stem cell population maintenance | biological_process | 1.68E-02 | 2  |
| GO:0007017 | microtubule-based process                 | biological_process | 1.68E-02 | 6  |
| GO:0022607 | cellular component assembly               | biological_process | 1.68E-02 | 10 |
| GO:0048522 | positive regulation of cellular process   | biological_process | 1.75E-02 | 14 |
| GO:0032501 | multicellular organismal process          | biological_process | 1.75E-02 | 15 |
| GO:0031214 | biomineral tissue development             | biological_process | 1.76E-02 | 3  |
| GO:0050789 | regulation of biological process          | biological_process | 1.83E-02 | 22 |
| GO:0000226 | microtubule cytoskeleton organization     | biological_process | 1.84E-02 | 5  |
| GO:0110148 | biomineralization                         | biological_process | 1.89E-02 | 3  |
| GO:0051179 | localization                              | biological_process | 2.28E-02 | 15 |
| GO:0010646 | regulation of cell communication          | biological_process | 2.51E-02 | 10 |
| GO:0023051 | regulation of signaling                   | biological_process | 2.54E-02 | 10 |
| GO:0060284 | regulation of cell development            | biological_process | 3.19E-02 | 4  |
| GO:0048519 | negative regulation of biological process | biological_process | 3.20E-02 | 13 |
| GO:0072593 | reactive oxygen species metabolic process | biological_process | 3.24E-02 | 3  |
| GO:0098869 | cellular oxidant detoxification           | biological_process | 3.25E-02 | 2  |
| GO:0006810 | transport                                 | biological_process | 3.25E-02 | 12 |
| GO:0009948 | anterior/posterior axis specification     | biological_process | 3.43E-02 | 2  |
| GO:0044458 | motile cilium assembly                    | biological_process | 3.43E-02 | 2  |
| GO:0007281 | germ cell development                     | biological_process | 3.43E-02 | 3  |
| GO:0010810 | regulation of cell-substrate adhesion     | biological_process | 3.43E-02 | 3  |

---

|            |                                                              |                    |          |    |
|------------|--------------------------------------------------------------|--------------------|----------|----|
| GO:0045732 | positive regulation of protein catabolic process             | biological_process | 3.43E-02 | 3  |
| GO:0070925 | organelle assembly                                           | biological_process | 3.43E-02 | 5  |
| GO:0050793 | regulation of developmental process                          | biological_process | 3.43E-02 | 8  |
| GO:0009966 | regulation of signal transduction                            | biological_process | 3.43E-02 | 9  |
| GO:0051234 | establishment of localization                                | biological_process | 3.43E-02 | 12 |
| GO:1990748 | cellular detoxification                                      | biological_process | 3.68E-02 | 2  |
| GO:0007275 | multicellular organism development                           | biological_process | 4.11E-02 | 11 |
| GO:0051247 | positive regulation of protein metabolic process             | biological_process | 4.16E-02 | 6  |
| GO:0097237 | cellular response to toxic substance                         | biological_process | 4.22E-02 | 2  |
| GO:1900024 | regulation of substrate adhesion-dependent cell spreading    | biological_process | 4.22E-02 | 2  |
| GO:0098754 | detoxification                                               | biological_process | 4.49E-02 | 2  |
| GO:0048513 | animal organ development                                     | biological_process | 4.49E-02 | 9  |
| GO:0045595 | regulation of cell differentiation                           | biological_process | 4.59E-02 | 6  |
| GO:0048583 | regulation of response to stimulus                           | biological_process | 4.59E-02 | 10 |
| GO:0035082 | axoneme assembly                                             | biological_process | 4.71E-02 | 2  |
| GO:0045807 | positive regulation of endocytosis                           | biological_process | 4.71E-02 | 2  |
| GO:0051702 | biological process involved in interaction with symbiont     | biological_process | 4.71E-02 | 2  |
| GO:0062197 | cellular response to chemical stress                         | biological_process | 4.71E-02 | 3  |
| GO:0045596 | negative regulation of cell differentiation                  | biological_process | 4.71E-02 | 4  |
| GO:0009653 | anatomical structure morphogenesis                           | biological_process | 4.71E-02 | 8  |
| GO:0045229 | external encapsulating structure organization                | biological_process | 4.84E-02 | 3  |
| GO:0030198 | extracellular matrix organization                            | biological_process | 4.84E-02 | 3  |
| GO:0043408 | regulation of MAPK cascade                                   | biological_process | 4.84E-02 | 4  |
| GO:0043062 | extracellular structure organization                         | biological_process | 4.91E-02 | 3  |
| GO:0009798 | axis specification                                           | biological_process | 4.95E-02 | 2  |
| GO:0030317 | flagellated sperm motility                                   | biological_process | 4.95E-02 | 2  |
| GO:0010769 | regulation of cell morphogenesis involved in differentiation | biological_process | 4.95E-02 | 2  |

---

|            |                                                                     |                    |          |    |
|------------|---------------------------------------------------------------------|--------------------|----------|----|
| GO:0034644 | cellular response to UV                                             | biological_process | 4.95E-02 | 2  |
| GO:0097722 | sperm motility                                                      | biological_process | 4.95E-02 | 2  |
| GO:0022412 | cellular process involved in reproduction in multicellular organism | biological_process | 4.95E-02 | 3  |
| GO:0045862 | positive regulation of proteolysis                                  | biological_process | 4.95E-02 | 3  |
| GO:0003006 | developmental process involved in reproduction                      | biological_process | 4.95E-02 | 4  |
| GO:0080134 | regulation of response to stress                                    | biological_process | 4.95E-02 | 5  |
| GO:0010647 | positive regulation of cell communication                           | biological_process | 4.95E-02 | 6  |
| GO:0023056 | positive regulation of signaling                                    | biological_process | 4.95E-02 | 6  |
| GO:0009605 | response to external stimulus                                       | biological_process | 4.95E-02 | 7  |
| GO:0051128 | regulation of cellular component organization                       | biological_process | 4.95E-02 | 7  |
| GO:0002376 | immune system process                                               | biological_process | 4.95E-02 | 7  |
| GO:0006950 | response to stress                                                  | biological_process | 4.95E-02 | 9  |
| GO:0023052 | signaling                                                           | biological_process | 4.95E-02 | 13 |

---

**Table S17.** Oligonucleotides Used for WISH Probe.

| Gene          | Forward primer 5'-3' | Reverse primer 5'-3' | Length |
|---------------|----------------------|----------------------|--------|
| <i>PWWP2A</i> | CCGGTCACTCATCTCATCGG | GAGCGTGGATCACTACGAGG | 834    |

**Table S18.** sgRNA Core Sequence and Nested Primers.

| Gene          | Primer         | Sequence 5'-3'                                                  |
|---------------|----------------|-----------------------------------------------------------------|
| <i>PWWP2A</i> | sgRNA1         | TAATACGACTCACTATAGGAAAATGGCGGCCGTGGCT<br>GGTTTTAGAGCTAGAAATAGC  |
|               | sgRNA2         | TAATACGACTCACTATAGGTGCGGAGCCAGGAGCTGC<br>TGGTTTTAGAGCTAGAAATAGC |
|               | Forward primer | GCCAAAGTTGCATCCTCATAA                                           |
|               | Reverse primer | GGCCTTCTGATTTCATTG                                              |

**Table S19.** RT-PCR primers.

| <b>Gene</b>   | <b>Forward primer 5'-3'</b> | <b>Reverse primer 5'-3'</b> | <b>Length</b> |
|---------------|-----------------------------|-----------------------------|---------------|
| <i>PWWP2A</i> | ACCTCTCGAGAAGGTTCCGAC       | TGTCTCTGACTGGAATGCCTCCAT    | 116           |
| <i>TYR</i>    | AACGCGCTGGAAGGTTTTGC        | TTGGCAGATCCCTGCACTGAAGA     | 122           |
| <i>TYRP1a</i> | AGCGCGACATGCAGGATATG        | TTGGAGCTGATGGCAGTGGAGT      | 145           |
| <i>TYRP1b</i> | AGCGCGACATGCAGGATATG        | TTGGAGCTGATGGCAGTGGAGT      | 145           |
| <i>DCT</i>    | AGACACGCTTCTGGGTCCTG        | AAGTTCTCATTACCCGTCAGTTTCTG  | 138           |
